# Supplementary material
Source: PubMed Central journal article supplement (PMC3554095)
Supplement: JVI.02089-12_zjv999097151so1.pdf [file JVI.02089-12_zjv999097151so1.pdf]

**Supplemental Table 1: Selected vaccinia WR proteins spotted on microarray chip**

|              |              |              |              |
|--------------|--------------|--------------|--------------|
| WR001 (C23L) | WR061 (E5R)  | WR118 (D13L) | WR152 (A29L) |
| WR008 (C19L) | WR064 (E8R)  | WR122 (A3L)  | WR156 (A33R) |
| WR010 (C10L) | WR070 (I1L)  | WR123 (A4L)  | WR157 (A34R) |
| WR026 (C2L)  | WR072 (I3L)  | WR128 (A9L)  | WR159 (A36R) |
| WR032 (K1L)  | WR082 (G5R)  | WR129 (A10L) | WR167 (A42R) |
| WR033 (K2L)  | WR087 (G9R)  | WR130 (A11R) | WR169        |
| WR034 (K3L)  | WR091 (L4R)  | WR132 (A13L) | WR172 (A46R) |
| WR041 (F2L)  | WR092 (L5R)  | WR133 (A14L) | WR173 (A47L) |
| WR042 (F3L)  | WR095 (J3R)  | WR137 (A17L) | WR176 (A50R) |
| WR046 (F7L)  | WR097 (J5L)  | WR138 (A18R) | WR181 (A56R) |
| WR048 (F9L)  | WR101 (H3L)  | WR147        | WR184 (B2R)  |
| WR052 (F13L) | WR103 (H5R)  | WR148        | WR186 (B4R)  |
| WR056 (F17R) | WR104 (H6R)  | WR149 (A26L) | WR187 (B5R)  |
| WR057 (E1L)  | WR105 (H7R)  | WR150 (A27L) | WR197 (B16R) |
| WR059 (E3L)  | WR113 (D8L)  | WR151 (A28L) | WR218 (B29R) |
| WR060 (E4L)  | WR115 (D10R) |              |              |

Supplemental Table 2: Human reactivity post vaccination summary for three studies (1, 2).

| Author<br>System/methodology<br>Purity<br>Vaccinees | Townsend<br>cell free E. coli<br>crude<br>15 | Duke-Cohen<br>rabbit reticulocyte<br>crude<br>20 | Schmid<br>baculovirus<br>GST purified<br>20 |
|-----------------------------------------------------|----------------------------------------------|--------------------------------------------------|---------------------------------------------|
| % Reactivity                                        |                                              |                                                  |                                             |
| WR132 (A13L)                                        | 100                                          | nt                                               | nt                                          |
| WR118 (D13L)                                        | 93                                           | 36                                               | 70                                          |
| WR101 (H3L)                                         | 93                                           | 44                                               | 55                                          |
| WR113 (D8L)                                         | 93                                           | 24                                               | nt                                          |
| WR148                                               | 93                                           | nt                                               | nt                                          |
| WR137 (A17L)                                        | 87                                           | nt                                               | nt                                          |
| WR070 (I1L)                                         | 80                                           | nt                                               | 60                                          |
| WR130 (A11R)                                        | 60                                           | 8                                                | nt                                          |
| WR156 (A33R)                                        | 40                                           | 24                                               | 35                                          |
| WR129 (A10L)                                        | 40                                           | nt                                               | nt                                          |
| WR150 (A27L)                                        | 33                                           | 20                                               | 60                                          |
| WR123 (A4L)                                         | 27                                           | 8                                                | nt                                          |
| WR187 (B5R)                                         | 20                                           | 28                                               | nt                                          |
| WR157 (A34R)                                        | 20                                           | nt                                               | 0                                           |
| WR169                                               | 13                                           | nt                                               | 0                                           |
| WR103 (H5R)                                         | 7                                            | nt                                               | 35                                          |
| WR181 (A56R)                                        | 7                                            | 4                                                | nt                                          |
| WR091 (L4R)                                         | 7                                            | 12                                               | nt                                          |
| WR072 (I3L)                                         | 0                                            | nt                                               | 15                                          |
| WR088 (L1R)                                         | nt                                           | 20                                               | 0                                           |
| WR025 (C3L)                                         | nt                                           | nt                                               | 25                                          |

**Number of proteins recognized/proteins tested**

|               |       |       |       |
|---------------|-------|-------|-------|
| All Vaccinees | 18/61 | 12/25 | 8/218 |
| VIG           | 28/61 | 8/25  | 8/218 |

nt = not tested

References:

1. **Duke-Cohan, J. S., K. Wollenick, E. A. Witten, M. S. Seaman, L. R. Baden, R. Dolin, and E. L. Reinherz.** 2009. The heterogeneity of human antibody responses to vaccinia virus revealed through use of focused protein arrays. *Vaccine* **27**:1154-1165.
2. **Schmid, K., S. L. Keasey, P. Pittman, G. L. Emerson, J. Meegan, A. P. Tikhonov, G. X. Chen, B. Schweitzer, and R. G. Ulrich.** 2008. Analysis of the human immune response to vaccinia by use of a novel protein microarray suggests that antibodies recognize less than 10% of the total viral proteome. *Proteom Clin Appl* **2**:1528-1538.
